# Supplementary material for: Effect of Atmospheric Stability on the Wind Resource extrapolating models for large capacity Wind Turbines: A Comparative Analysis of Power Law, Log Law and Deaves and Harris mode
Source: Copernicus journal article supplement (doi:10.5194/wes-2018-16), 2018-04-03
Supplement: Supplementary file [file wes-2018-16-RC1-supplement.pdf]

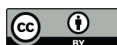

# Effect of Atmospheric Stability on the Wind Resource extrapolating models for large capacity Wind Turbines: A Comparative Analysis of Power Law, Log Law and Deaves and Harris model

<sup>1</sup>Pramod Kumar Sharma, <sup>2</sup>Vilas Warudkar, <sup>3</sup>Siraj Ahmed

<sup>1</sup>Research Scholar, Department of Mechanical Engineering, M.A.N.I.T, Bhopal [M.P] India

<sup>2</sup>Assistant Professor, Department of Mechanical Engineering, M.A.N.I.T, Bhopal [M.P] India

<sup>3</sup>Professor, Department of Mechanical Engineering, M.A.N.I.T, Bhopal [M.P] India

\*Corresponding author: sharma786pramod@gmail.com

Telephone Number : +91 7554051611, +91 7554051616

Fax : +91 7552670562

## Abstract

To observe accurate wind climate from the available met mast measured wind data at different heights an accurate wind shear model is necessary. Since WAsP and windPRO is software package which provide the better representation of wind profile over homogenous terrain only. Though, a separate module named a WAsP CH has been added in both of the software to predict correct wind resource in complex terrain also. Wind days which dependent wind resource model has been become a key issue for the researchers. If many wind extrapolating model such as PL (power law), LogL (log law), LogLL (Log linear law) and Deaves and Harris Model Log law was found to be better representation of wind profile. This study presents a comparative analysis of three different wind extrapolation models. Based on one year (2015-2017) wind data from met mast of 10m interval at 10, 50, 80, 100 and 102m, and the result was compared with the relation of atmospheric stability. Licensed version of WAsP and windPRO software was also used to calculate wind resource parameter such as roughness index and roughness class etc. RMSE and NRMSE was found to be least in case of log linear model which is 0.11 and 0.01784 respectively in compare to PL and Deaves and Harris models.

**Keywords:** BL, LIDAR, Monin-Obukhov length, Richardson Number, WAsP, windPRO



36

37

22

Unknown

38

23

2018-05-17  
 Unknown

39

40

41

42

43

24-25

2 notes:

44

45

46

47

48

49

50

51

26-27

2 notes:

52

53

54

55

28-29

2 notes:

56

57

30-31

2 notes:

58

59

60

61

## Glossary

### Abbreviations

|         |                                                  |
|---------|--------------------------------------------------|
| WT      | wind turbine                                     |
| WAsP    | Wind Resource Analysis and Application Programme |
| windPRO | Wind Energy Project Design and Planning          |
| PL      | Power law                                        |
| LogL    | Log linear law                                   |
| ABL     | Atmospheric Boundary Layer                       |
| MOST    | Monin-Obukhov similarity theory                  |
| LogLL   | log-linear law                                   |
|         | Maximum likelihood method                        |
|         | Modified Maximum likelihood method               |
| Ri      | Richardson number                                |
| CFD     | Computational fluid dynamics                     |
| LIDAR   | Light Detection and Ranging                      |
| PD      | Panofsky and Dutton (PD) model                   |

### Variables

|          |                                            |
|----------|--------------------------------------------|
| $v$      | wind speed [m/s]                           |
| $k$      | shape factor                               |
| $c$      | size factor [m/s]                          |
| $u^*$    | friction velocity [m/s]                    |
| $z_o$    | roughness length [m]                       |
| $K$      | von Karman's constant (assuming 0.4)       |
| $L$      | Monin-Obukhov length [m]                   |
| $\rho$   | density [kg/m <sup>3</sup> ]               |
| $C_p$    | specific heat at constant pressure         |
| $H$      | sensible heat flux [k. m.s <sup>-1</sup> ] |
| $T$      | temperature in Kelvin [K]                  |
| $\Phi_m$ | Monin-Obukhov stability function           |
| $\alpha$ | wind shear exponent                        |
| $v_g$    | geostrophic wind speed [m/s]               |
| $h$      | atmospheric boundary layer height [m]      |
| $f$      | Coriolis parameter [s <sup>-1</sup> ]      |

### Statistical parameter

|            |                                              |
|------------|----------------------------------------------|
| $n$        | total number of measured and calculated data |
| $m$        | number of measured data                      |
| $c$        | number of calculated data                    |
| $\mu_m$    | $\bar{m}_i$ mean of $n$ measured values      |
| $\sigma_m$ | standard deviation of $n$ measured values    |
| $\mu_c$    | $\bar{c}_i$ mean of $n$ calculated values    |
| $\sigma_c$ | standard deviation of $n$ calculated values  |
| RMSE       | root mean square error                       |



## 62 1. Introduction

63 This marks the end of the beginning for the low carbon economy. As per the report of REN21 Global Status Report  
64 (GSR) 2016, 173 countries across the world launched the target policy, 110 countries had in place either feed in  
65 policy. Accurate measurement of wind resource is necessary to erect any wind farm. Earlier method uses cup  
66 anemometer and wind turbine to measure the wind velocity and direction IEC. Due to advancement of wind power  
67 technology attention of researchers had turned to increase the hub height. To measure the wind data at more than  
68 100 m height by using conventional method through met mast is now becoming the costly and time consuming  
69 process. (Henry W. Tieleman, 2008) compared the observations from power law, logarithmic law and Deaves and  
70 Harris model in terms of mean wind speed and turbulence intensity. At 10m height non neutral thermal stability  
71 affects the wind velocity profile and should not be neglected. Daniel R. Drew et al. (2013) found to be best fit non  
72 equilibrium Deaves and Harris wind speed profile model in urban areas. Masaki Kikumoto et al., (2017)  
73 investigated the accuracy of wind speed measurement using PL in low speed region. The results were  
74 compared and analyzed with LiDAR and ultrasonic measured wind data in the urban boundary layer of  
75 Tokyo Japan. (Nicholas J. Cook, 1997) compared the wind speed profile with the power law and Deaves and Harris  
76 model fitted the profile near the ground and top of the ABL due to satisfying the criteria of both boundary  
77 conditions. Giovanni Gualtieri, Sauro Succi, (2011) compared and investigated the accuracy of prediction of wind  
78 speed over a flat and rough region at 10m and 50m height agl in which the role of atmospheric stability and surface  
79 roughness had discussed. (Giovanni Gualtieri, 2016) had investigated the time varying relation of wind  
80 exponent with atmospheric stability. The model was compared with PD and found to be most and accurate  
81 approach in terms of wind speed profile and energy yield calculation in neutral conditions. A number of  
82 equilibrium wind speed model namely as PL, LogL and DH had been discussed by (Davenport, 1960; Simiu and  
83 Scanlan, 1996; Deaves and Harris, 1978). Panofsky and Dutton (1984) and Elliott (1958) studied the effect of  
84 inner boundary layer with a step change in surface roughness for the urban wind profile predictions.  
85 Deaves (1981) had utilized the concept for heterogeneous terrain and this was adapted into UK wind loading  
86 code also. (Giovanni Gualtieri, 2017) tested and compared the DH model with PL with all stability conditions.  
87 The DH model found to be best fitted and tuned and its accuracy seems to be increased with height from 10m  
88 to 100m agl. Due to increasing demand of energy, wind resource prediction has become a crucial issue markedly for  
89 energy investors to accurately analyze the wind speed at different hub height of wind farm. This is very much necessary  
90 during the feasibility study to abate the cost of wind farm installation. There are many researchers who worked on  
91 different wind extrapolating models such as PL, LogL, LogLL and DH. Every model has its own significance and  
92 assumptions depending on the type of terrain where wind speed has to be predicted. (Sharma et. al. 2014) had  
93 optimized the higher wind monitoring tower using ANSYS for neutral Condition. (Sharma et. al. 2014) Further the  
94 work had extended had discussed the incorporation of advance piezoelectric and nano composite material for hybrid  
95 offshore tower material.

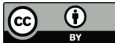

## 98 2. Wind Profile extrapolating models

99 First time originally power law was proposed for the purpose of designing the wind load especially in structural  
 100 engineering (Davenport, 1960). Due to simplicity of this model which can be applied to larger height in compare to  
 101 logarithmic law (Counihan, 1975) subjected to various terrain conditions. Following models had been generally  
 102 adopted for the wind profile predictions under certain assumptions:

### 103 2.1 Deaves and Harris (D&H) model

104 This model was developed in two stages in strong wind conditions. In the first stage it was developed for the ABL in  
 105 equilibrium over uniform roughness and in the second stage to account for multiple step changes in roughness.  
 106 model was further developed to different kind of heterogeneous terrain. UK, Australia and New Zealand  
 107 adapted this model into its wind design codes. If  $u_*$  is the friction velocity,  $k$  is the von Karman constant (0.4),  
 108  $z_0$  is the roughness length, and ABL height than velocity  $v$  has been define as:

109 The D&H model is also known as “logarithmic with parabolic defect” speed profile equation:

$$110 \quad V = \frac{u_*}{k} \left[ \ln \frac{z}{z_0} + 5.75 \left( \frac{z}{h} \right) - 1.88 \left( \frac{z}{h} \right)^2 - 1.33 \left( \frac{z}{h} \right)^3 + 0.25 \left( \frac{z}{h} \right)^4 \right] \quad (1)$$

$$111 \quad h = \frac{u_*}{6f} \quad (2)$$

112 where  $f$  is the Coriolis factor which depend on the site latitude angle. The extended model of D&H with step change  
 113 in roughness had been given the concept of transition from outer and inner boundary layer. It is described as:

$$114 \quad u_{*,inner} = u_{*,outer} \left[ 1 - \frac{\ln \left( \frac{z_{0,outer}}{z_{0,inner}} \right)}{0.42 + \ln m_0} \right] \quad (3)$$

$$115 \quad m_0 = \frac{0.32 X}{z_{0,inner} (\ln m_0 - 1)} \quad (4)$$

116  $X$  is the downward distance towards the change in surface roughness and  $m_0$  is the constant parameter.

117  
 118 At Similarity theory,

$$119 \quad \frac{V}{u_*} \cong \frac{1}{k} \ln \left( \frac{z}{z_0} \right) \text{ when } z \cong h \quad (5)$$

$$120 \quad V \rightarrow V_G \text{ and } \frac{dV}{dz} \rightarrow 0 \text{ as } z \rightarrow h \quad (6)$$

121  $V_G$  is for the geostrophic wind speed satisfies the criteria of upper and lower boundary conditions to the ABL.  
 122 Geostrophic wind speed calculated when the thermal flux generated by the heat and friction are equal.

### 123 2.2 Log- Law model

124 The log law model was derived from Eq. (5) and holds over a ground surface:

$$125 \quad V = \frac{u_*}{k} \ln \left( \frac{z}{z_0} \right) \quad (7)$$

126 It is clear from Eq. (7) that log law satisfies the lower boundary conditions only not the upper one. Typically it had  
 127 been found to poor model for a height greater than 200m.

128 Power law model

79-84  
 6 notes:

85-92  
 8 notes:

93-95  
 3 notes:

96-97  
 2 notes:

98-99  
 2 notes:

100-101  
 2 notes:

102-104  
 3 notes:

105

Unknown

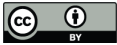

129 The wind speed at a height  $z$  uses the empirical formula:

$$130 \quad \frac{V}{V_{ref}} = \left( \frac{z}{z_{ref}} \right)^\alpha \quad (8)$$

131 the wind speed at the height say  $z_{ref}$ . Power law indicates the increment of surface wind speed with height  $z$ . The PL neither satisfies the upper boundary nor the lower boundary conditions. To compare with PL model it fits well for the wind speed profile at larger height, which is one of the critical reason for its preference. Though, it had not been recommended to use it very close to the ground. Most of the research matched well with the PL over the height value from 300m to 300m a.g.l. The value of  $\alpha$  varies with respect to wind speed, height and surface roughness. In practice, the wind shear exponent  $\alpha$  often assumed as equivalent to the aerodynamic roughness length  $z_0$ .

#### 138 2.4 Estimation of Monin-Obukhov length

139 The turbulence within the surface boundary layer is defined by Monin- Obukhov length scale  $L$  as:

$$140 \quad L = - \frac{\rho C_p T u_*^3}{k g H} \quad (9)$$

141 where  $\rho$  stands for air density at temperature  $T$ ,  $C_p$  is the specific heat at constant pressure,  $k$  is the Von Karman constant  $u_*$  is the friction velocity and  $H$  is the sensible heat flux. The Monin- Obukhov length scale  $L$  can be calculated by computing the Bulk Richardson number which requires only single wind speed and temperature measurements at two heights. Gradient and bulk Richardson number can be defined as:

$$145 \quad R_i = \frac{g \Delta z \Delta \theta}{\theta_1 \Delta u^2} \quad (10)$$

146 where  $\Delta \theta = \theta_2 - \theta_1$ ,  $\Delta z = z_2 - z_1$  and  $\Delta u = u_2 - u_1$  are the measured parameter at two height. When the temp. and wind speed measurement is available only at single height (Barker and Baxter, 1975)

$$148 \quad R_{ib} = \frac{g z_2 \Delta \theta}{\theta_2 u_2^2} \quad (11)$$

$$149 \quad \varepsilon = \frac{\phi_m^2}{\phi_h} R_i \text{ (Businger et.al., 1971) suggested} \quad (12)$$

150  $\bar{z} = \varepsilon$ ,  $\bar{z}$  stands for geometrical mean height of  $z_1$  and  $z_2$ , and  $\phi_m$  and  $\phi_h$  are the non dimensional functions related to Wind shear and temperature gradient, as per (Dyer, 1974)  $\phi_m$  and  $\phi_h$  :

$$152 \quad \phi_m = \begin{cases} (1 - \gamma \varepsilon)^{\frac{1}{4}}, & \varepsilon < 0 \\ (1 + \beta \gamma), & \varepsilon \geq 0 \end{cases} \quad (13)$$

$$153 \quad \phi_h = \begin{cases} R(1 - \gamma \varepsilon)^{\frac{1}{2}}, & \varepsilon < 0 \\ (R + \beta \gamma), & \varepsilon \geq 0 \end{cases} \quad (14)$$

154 (Binkowski, 1975) found the following results, the function based on two stability conditions

$$155 \quad \varepsilon = \begin{cases} \frac{R_i}{R} (1 - \gamma R_i)^{\frac{1}{2}} / (1 - \gamma R_i)^{\frac{1}{2}} & R_i \leq 0 \\ \frac{R_i}{R} & 0 < \frac{R_i \beta^2}{\beta} < 1 \end{cases} \quad (15)$$

$$156 \quad \bar{z} = \frac{z_1 + z_2}{2}, \quad \bar{z} \text{ is the mean height} \quad (16)$$

$$158 \quad \frac{z_2}{L} = \frac{k R_{ib} F^2}{G} \quad (17)$$

$$159 \quad F = \frac{u}{u_*} \begin{cases} \ln \left[ \left( \frac{z_2}{z_0} \right) \left( \frac{\eta_o^2 + 1}{\eta_2^2 + 1} \right) \left( \frac{\eta_o + 1}{\eta_2 + 1} \right)^2 \right] + 2 \tan^{-1} \left( \frac{\eta_o - \eta_2}{1 + \eta_o \eta_2} \right), & L \leq 0 \\ \ln \left( \frac{z_2}{z_0} \right) + \frac{\beta z_2}{L}, & L \geq 0 \end{cases} \quad (18)$$

160  $L$  depends upon two stability conditions

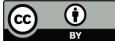

161

$$G = \frac{\Delta \theta u_*}{(-w'\theta')} = \begin{cases} R \ln \left[ \left( \frac{z_2}{z_0} \right) \left( \frac{\lambda_1 + 1}{\lambda_2 + 1} \right)^2 \right], & L \leq 0 \\ R \left[ \ln \left( \frac{z_2}{z_0} \right) + \frac{\beta(z_2 - z_1)}{L} \right], & L \geq 0 \end{cases} \quad (19)$$

$$\eta_2 = (1 - \gamma z_2 / L)^{\frac{1}{4}} \quad (20)$$

$$\eta_0 = (1 - \gamma z_0 / L)^{\frac{1}{4}} \quad (21)$$

$$\lambda_1 = (1 - \gamma' z_1 / L)^{\frac{1}{2}} \quad (22)$$

$$\lambda_2 = (1 - \gamma' z_2 / L)^{\frac{1}{2}} \quad (23)$$

167 Where  $\eta_2$   $\eta_0$   $\lambda_1$   $\lambda_2$  are the function of Monin- Obukhov length  $L$ .  $G$  is the function of Richardson number and mean  
 168 gradient height  $z$ .  $F$  stands for logarithmic function of speed and friction velocity.

### 169 3. Observation and site details

170 Jamgodrani hills have a huge potential in terms of power production. The 100m mast is located in District Dewas at  
 171 Jamgodrani Hills. The elevation of the mast location is 573m above mean sea level. Site coordinate has been  
 172 converted into UTM (Universe Transverse Mercator) system to perform line and area roughness calculation purpose  
 173 using WASP and windPRO. There were five wind anemometers and wind vane had mounted on the mast to measure  
 174 wind speed and direction respectively. To verify the Monin- Obukhov Similarity theory two temperatures and one  
 175 pressure sensor had also installed. Table 1 and Fig.1 shows the mast details and location respectively.

176 Table 1 Site Details

|                                 |                                                                                     |
|---------------------------------|-------------------------------------------------------------------------------------|
| Site Coordinate                 | (E)Longitude- 76°09'2.50"<br>(N) Latitude- 22°58' 58.20"<br>UTM-2542426 N, 619480 E |
| Duration                        | 2015 to 2017                                                                        |
| Site name                       | Jamgodrani Hills                                                                    |
| District                        | Dewas                                                                               |
| State name                      | Madhya Pradesh                                                                      |
| Mast Height                     | 100m                                                                                |
| Elevation                       | 573mAMSL                                                                            |
| Location of Anemometer          | 10m, 25m, 50m, 80m, 100m.                                                           |
| Location of Wind vane           | 10m, 25m, 50m, 80m, 100m                                                            |
| Location of Pressure sensors    | 2m, 10m                                                                             |
| Location of temperature sensors | 2m, 10m                                                                             |

113-114  
 2 notes:



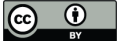

177

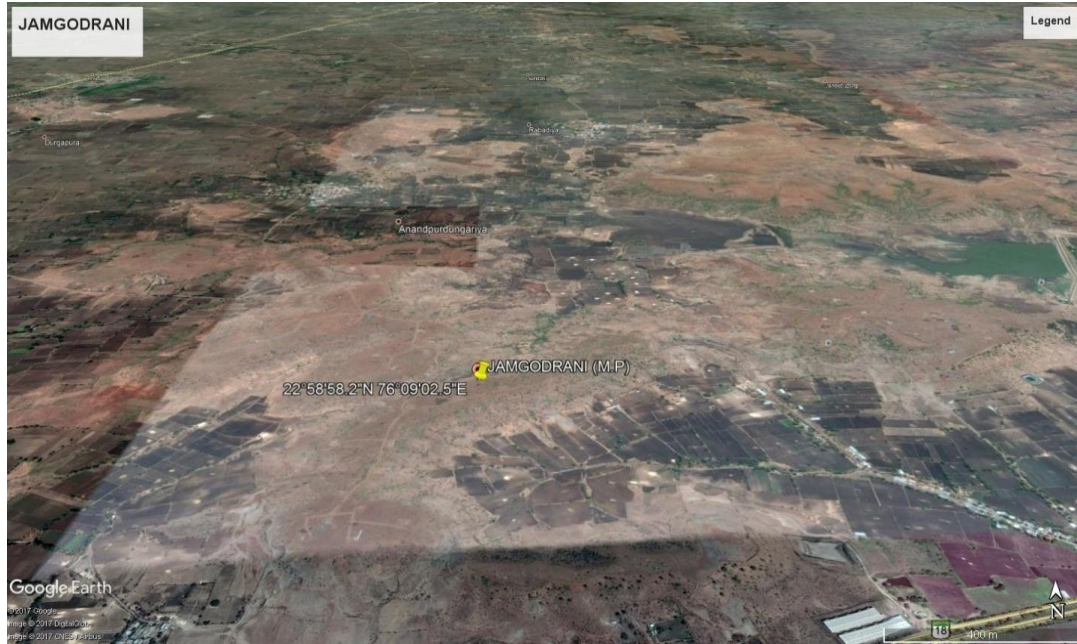

178

Fig. 1 Met mast location (Source Google Earth)

179

180

181

182

183

184

185

186

187

188

189

190

191

192

193

194

Weibull parameter (k and c) was calculated by two different methods namely as MLM and MMLM. very much clear from the Table 3 in compare to Table 2 Weibull parameter are more than Table 2.

MLM is a widely accepted method to estimate the Weibull parameter. It requires more extensive mathematical calculations. In the first step k is calculated by using the following equation.

$$k = \left( \frac{\sum_{i=1}^n v_i^k \ln(v_i)}{\sum_{i=1}^n v_i^k} - \frac{\sum_{i=1}^n \ln(v_i)}{n} \right)^{-1} \quad (24)$$

$$c = \left( \frac{1}{n} \sum_{i=1}^n v_i^k \right)^{\frac{1}{k}} \quad (25)$$

n stands no of observation of zero wind speed and  $v_i$  i<sub>th</sub> operation wind speed.

This method is similar to MLM and estimated by iteratively using the following two equations . It is used when wind data is available in frequency distribution form. If  $v_i$  is the wind speed related to bin i,  $f(v_i)$  is the frequency range within the region of bin i, n is the total no of bins and  $f(v \geq 0)$  is the probability of wind speed.

$$k = \left( \frac{\sum_{i=1}^n v_i^k \ln(v_i) f(v_i)}{\sum_{i=1}^n v_i^k f(v_i)} - \frac{\sum_{i=1}^n \ln(v_i) f(v_i)}{f(v \geq 0)} \right)^{-1} \quad (26)$$

$$c = \left( \frac{1}{f(v \geq 0)} \sum_{i=1}^n v_i^k \right)^{\frac{1}{k}} \quad (27)$$

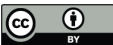

Table 2 Weibull parameter by MLM

| 100m |       | 80m   |      | 50m    |      | 10m   |       |
|------|-------|-------|------|--------|------|-------|-------|
| k    | c     | k     | c    | k      | c    | k     | c     |
| 2.24 | 7.131 | 2.219 | 6.70 | 2.3621 | 6.25 | 2.164 | 4.193 |

Table 3 Weibull parameter by MMLM

| 100m  |      | 80m  |      | 50m  |      | 10m  |       |
|-------|------|------|------|------|------|------|-------|
| k     | c    | k    | c    | k    | c    | k    | c     |
| 2.431 | 7.67 | 2.42 | 7.24 | 2.57 | 6.78 | 2.45 | 4.736 |

\*Roughness length=0.3183m, \*Class= 2.8

#### 4. Result & Discussion

Annual mean wind speed and turbulence intensity is plotted at different heights from ground level. It is clear from Table 4 that the annual wind speed increase with respect height, but mean turbulence intensity decreases. Due to more predominate viscous and obstruction effect near the ground level wind turbulence is more. height from the ground increases wind becomes so smooth cause rapidly decrease in TU.

Table 4 Wind characteristics

| AMWS (Annual Mean wind speed) in m/s |      |      |      | ANNUAL TURBULANCE INTENSITY (TU) |       |       |      |
|--------------------------------------|------|------|------|----------------------------------|-------|-------|------|
| 100m                                 | 80m  | 50m  | 10m  | 100m                             | 80m   | 50m   | 10m  |
| 6.32                                 | 5.93 | 5.53 | 3.71 | 0.124                            | 0.143 | 0.150 | 0.24 |

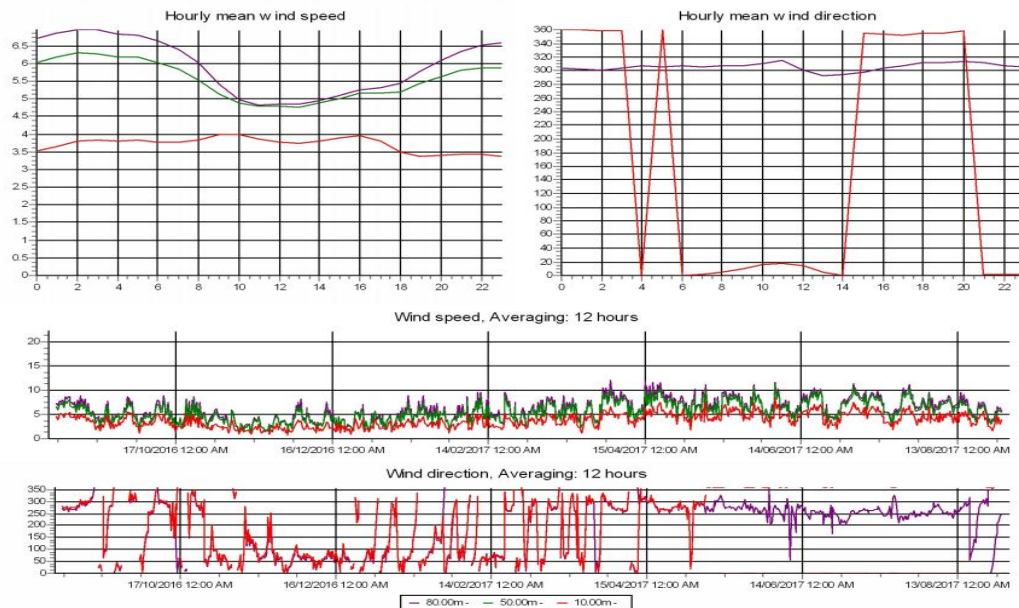

Fig. 2 Wind speed and direction variation



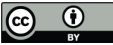

208 The hourly variation of wind speed and direction has been shown in Fig. 2 at 10m, 50m and 80m height  
209 respectively.

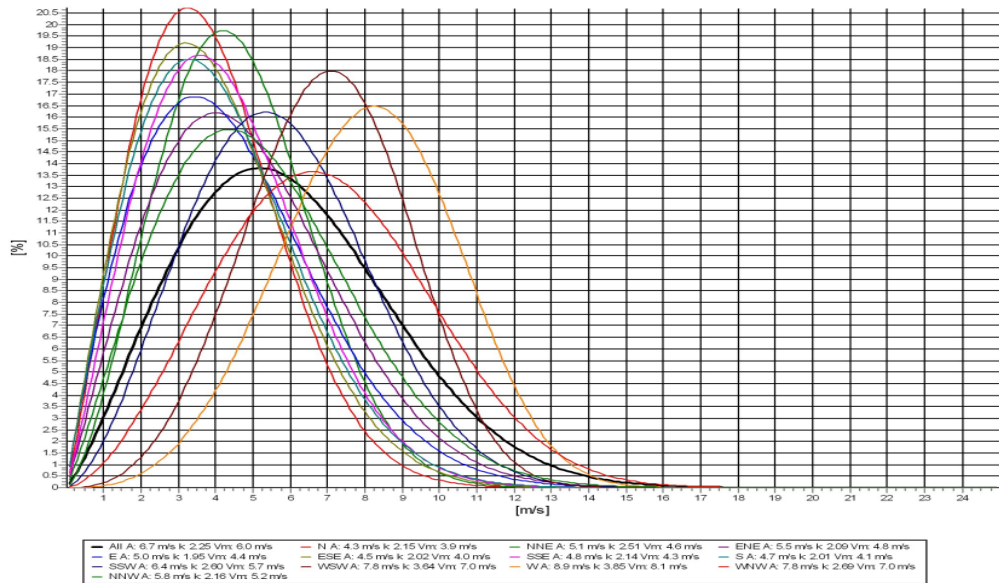

210

211

Fig. 3 Sector wise Weibull parameter distribution at 80m height a.g.l.

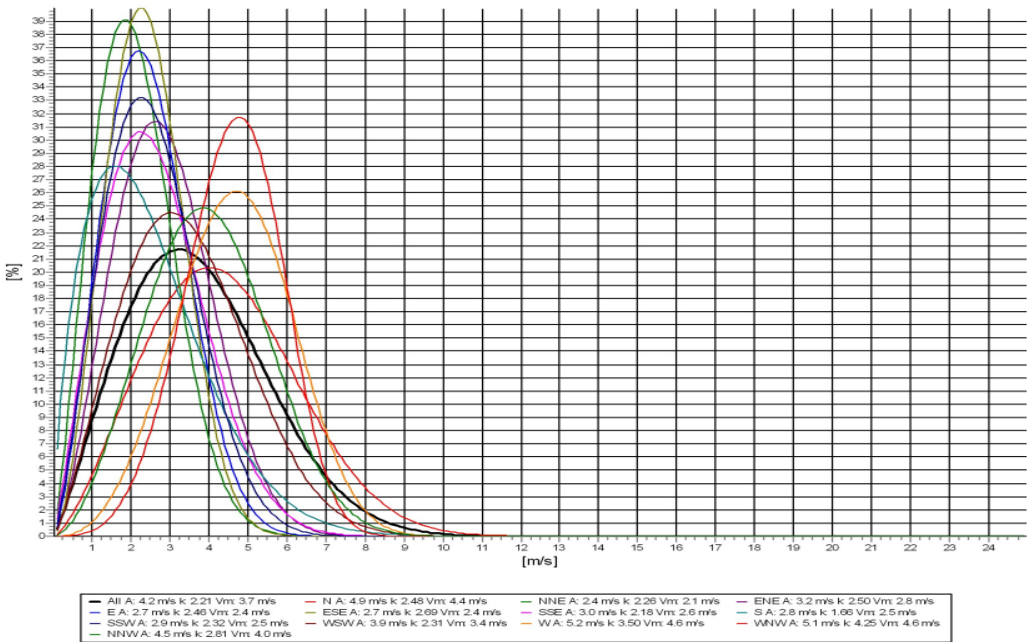

212

213

Fig. 4 Sector wise Weibull parameter distribution at 10m height a.g.l.

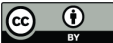

Fig.3 and Fig. 4 shows the sector wise distribution of Weibull parameter at 80m and 10m height respectively.

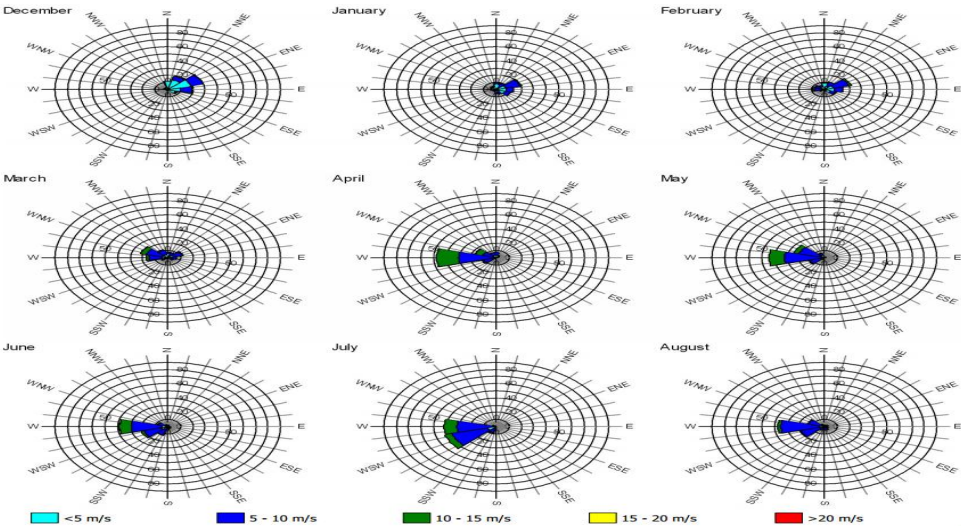

Fig. 5 Energy rose at 80m height

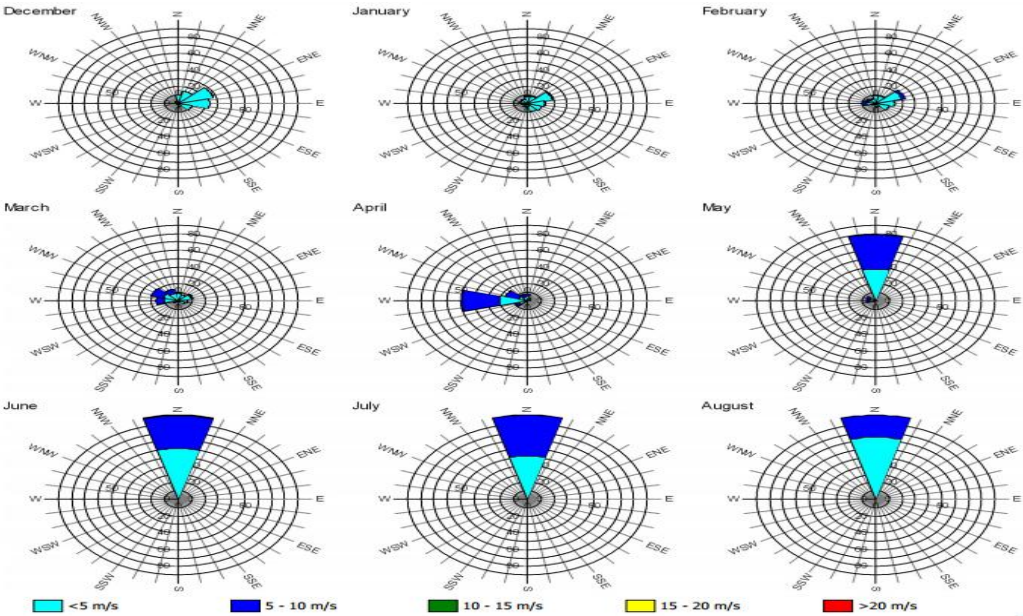

Fig. 6 Energy rose at 10m height



In Fig. 5 (April month) upto 30 m/s wind speed has been shown, which produces maximum power density at 80m height. While Fig. 6 indicates that the maximum wind speed can be utilized for the power production is 3-5 m/s at 10m height. The measured wind speed at 10m a.g.l. can be taken as reference purpose. Further Wind speed has been extrapolated using PL from 50m to 100m and 80m to 100m by  $\alpha_{10-50} = 0.2483$  and  $\alpha_{50-80} = 0.1474$  respectively. By taking the surface roughness length of  $z_0 = 0.3183$  m, von karman factor 0.4 and friction velocity  $u_* = 0.4316$  m/s the wind speed can be found using LogL at 100m a.g.l. as 6.20m/s.

The Monin-Obukhov Length similarity had been applied at Jhadrani hills which predict that the atmosphere is strongly stable and wind speed using D&H model found to be 6.68 m/s. The Richardson Number is 0.35614 which has been used to calculate Monin-Obukhov scale.

231

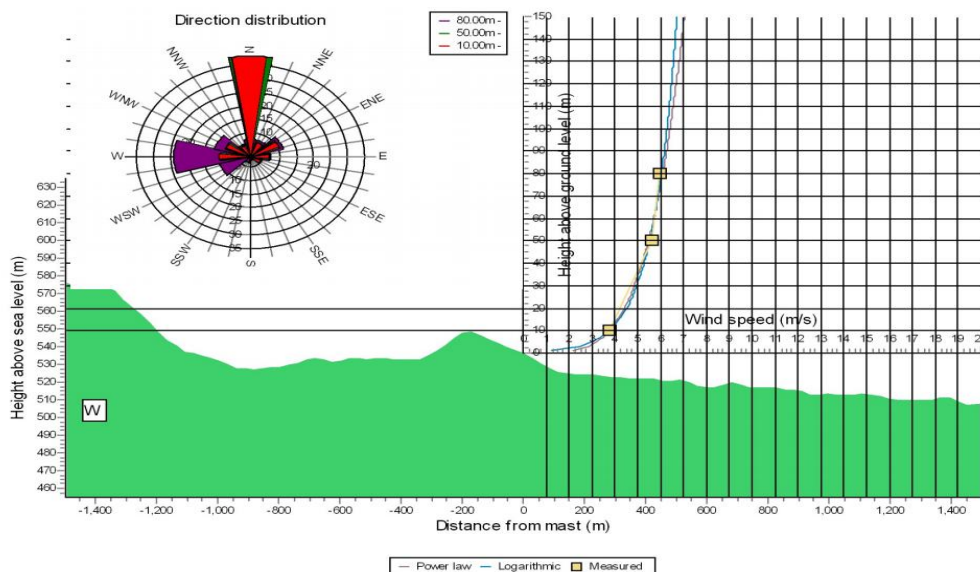

232

233 Fig. 7 Mean wind profile using power law and LogL respectively

234 Table 5 Comparative analysis between different models

235

| Parameter/Results | Predicted by PL<br>( $\alpha_{10-50} = 0.2483$ ) | Predicted by PL<br>( $\alpha_{50-80} = 0.1474$ ) | LogL     | D&H model |
|-------------------|--------------------------------------------------|--------------------------------------------------|----------|-----------|
| Wind speed in m/s | 6.580                                            | 6.135                                            | 6.204    | 6.681     |
| RMSE              | 0.26398                                          | 0.18085                                          | 0.111701 | 0.36485   |
| NRMSE             | 0.04094                                          | 0.02905                                          | 0.017842 | 0.056139  |

236

237 It is clear from Table 5 that Log law fitted and best matches the wind profile. RMSE and NRMSE found to be least  
238 in case of Log law in compare to PL and D&H model. The actual measured wind speed by wind anemometer is 6.32  
239 m/s at 100m a.g.l. It can be seen from Fig. 7 that the accuracy of the LogL increases from the height above 80m  
240 a.g.l.

241



## 242 243 5. Conclusion

244 To validate its capability as a wind speed prediction tool for addressing MW WTs, PL, LogL and  
 245 D&H model was assessed at hub heights at 50m, 80m and 100m based on a one year data (Apr-2017) of 10  
 246 min. observations including temperature and pressure data from the weather station of Jamgodrani hills, all models were  
 247 compared. The application of PL model has required prior assessment of sites surface parameter such as  $\alpha$  for power  
 248 law, friction velocity and surface length for Log law and Coriolis factor, ABL height for D&H model. Though,  
 249 D&H model was actually developed for strong wind conditions subjected to neutral conditions, it was forced to  
 250 applied for all stability regions.

251 PL, LogL and Deaves and Harris model is outperformed upto height 80m g.l. within the extrapolating range.  
 252 Results seem to the LogL capability of best producing at higher level. This model has been found to be  
 253 suitable for strong adiabatic conditions. However, the overall accuracy of LogL model during these conditions  
 254 should be chosen as a model's key factor. Practically, in Indian conditions the DH model could not fit appropriate  
 255 due to two limitations: i) reliable friction observation ii) accurate site's surface length assessment. Since, the value  
 256 of  $Z_0$  has the major effect on DH model.

257 Based on 10 min. wind speed, pressure and temperature data the minimum RMSE and NRMSE found to be 0.11 and  
 258 0.01 respectively. The PL exhibited the more accuracy across all extrapolations ranges and for all stability criteria,  
 259 which is used particularly in predicting wind speed profile variation. Currently, obtained results strongly encourage  
 260 further uses of the PL, which would be deemed as a future research topic from a wind energy scenario. At  
 261 Jamgodrani hills LogL proved to be the finest in prediction the extrapolated wind speed, thus supporting its validity  
 262 over the entire ABL.

## 263 References

- 264 Barker, E. H., Baxter, T. L., 1975. A note on the computation of atmospheric surface layer fluxes for use in  
 265 numerical modeling. J. Appl. Met. 14, 620-622.  
 266 Binkowski, F. S. 1975. On the empirical relationship between the Richardson number and the Monin-Obukhov  
 267 stability parameter. Atmospheric Environmental, 9, 453-454.  
 268 Businger, J. A., Wyngaard J. C, Izumi Y. and Bradley E. F. 1971. Flux- profile relationships in the atmospheric  
 269 surface layer. J. Atmos. Sci. 288, 181-189.  
 270 Cook, Nicholas J., 1997. The Deaves and Harris ABL model applied to heterogeneous terrain. Journal of Wind  
 271 Engineering and Industrial Aerodynamics. 66 (1991) 197-214.  
 272 Counihan, J., 1975. Adiabatic atmospheric boundary layers: a review and analysis of data from the period 1880–  
 273 1972. Atmos. Environ. 9, 871–905. [http://dx.doi.org/10.1016/0004-6981\(75\)90088-8](http://dx.doi.org/10.1016/0004-6981(75)90088-8).  
 274 Davenport, A., 1960. Rationale for determining design wind velocities. Journal of Structural Engineering, ASCE  
 275 86, 39–68.  
 276 Deaves, D., 1981. Computations of wind flow over changes in surface roughness. Journal of Wind Engineering and  
 277 Industrial Aerodynamics 7, 65–94.  
 278 Deaves, D., Harris, R., 1978. A Mathematical model of the structure of strong winds. Report 76. Construction Industry  
 279 Research and Information Association.  
 280 Drew, Daniel R., Barlow, Janet F., Lane, Siân E., 2013. Observations of wind speed profiles over Greater London,  
 281 UK, using a Doppler lidar. J. Wind Eng. Ind. Aerodyn. 121(2013)98–105.  
 282 Dyer, A., 1974. A review of flux-profile relationships. Boundary-Layer Met. 7, 363-312.  
 283 Elliott, W., 1958. The growth of the atmospheric internal boundary layer. American Geophysical Union 39, 1048–  
 284 1054.  
 285 Gualtieri, Giovanni., Secci, Sauro., 2011. Comparing methods to calculate atmospheric stability-dependent wind  
 286 speed profiles: A case study on coastal location. Renewable Energy 36 (2011) 2189-2204



287 Gualtieri, Giovanni., 2017. Wind resource extrapolating tools for modern multi-MW wind turbines: Comparison of  
 288 the Deaves and Harris model vs. the power law. *Journal of Wind Engineering & Industrial Aerodynamics* 170  
 289 (2017) 107–117.  
 290 Gualtieri, Giovanni., 2016. Atmospheric stability varying wind shear coefficients to improve wind resource  
 291 extrapolation: A temporal analysis. *Renewable Energy* 87 (2016) 376-390.  
 292 Kikumoto, Hideki., Ooka, Ryozi., Sugawara, Hirofumi., Lim, Jongyeon., 2017. Observational study of power-  
 293 law approximation of wind profiles within an urban boundary layer for various wind conditions. *Journal of Wind*  
 294 *Engineering & Industrial Aerodynamics* 164 (2017) 13–21.  
 295 Panofsky, H., Dutton, J., 1984. *Atmospheric Turbulence: Models and Methods for Engineering Applications*. Wiley.  
 296 Simiu, E., Scanlan, R., 1996. *Wind effects on structures fundamentals and applications to design*. John Wiley and Sons  
 297 Inc.  
 298 Sharma, Pramod Kumar., Baredar, Prashant V. 2017. Analysis on piezoelectric energy harvesting small scale device  
 299 – a review . <https://doi.org/10.1016/j.jksus.2017.11.002>.  
 300 Sharma, Pramod Kumar., Warudkar, Vilas., Ahmed, Siraj. 2014. Experimental investigation of Al 6061/ Al<sub>2</sub>O<sub>3</sub>  
 301 Composite and Analysis of its mechanical properties on onshore wind tower using hybrid technique for Indian  
 302 Condition. *Procedia Materials Science* 5 (2014 ) 147 – 153.  
 303 Sharma et.al., 2014. A Review on Electromagnetic Forming Process.” *Procedia Materials Science* 6 ( 2014 ) 520 –  
 304 527.  
 305 Sharma, Pramod Kumar., Warudkar, Vilas., Ahmed, Siraj. 2014. Design and Optimization of 150 m Higher Wind  
 306 Monitoring Tower (Indian Condition). *International Journal of Scientific Engineering and Technology*. (ISSN :  
 307 2277-1581). 2014 Volume No.3 Issue No.2, pp : 85 – 89.  
 308 Tieleman, Henry W., 2008. Strong wind observations in the atmospheric surface layer. *Journal of Wind Engineering*  
 309 *and Industrial Aerodynamics* 96 (2008) 41–77.  
 310  
 311  
 312  
 313  
 314  
 315  
 316  
 317  
 318  
 319  
 320  
 321  
 322



# Effect of Atmospheric Stability on the Wind Resource extrapolating models for large capacity Wind Turbines : A Comparative Analysis of Power Law , Log Law and Deaves and Harris model

Sharma, Pramod Kumar; Warudkar, Vilas; Ahmed, Siraj

- |                                                                 |                 |        |
|-----------------------------------------------------------------|-----------------|--------|
| 01                                                              | Unknown Unknown | Page 1 |
| 17/5/2018 3:03                                                  |                 |        |
| 02                                                              | Unknown Unknown | Page 1 |
| 17/5/2018 3:04                                                  |                 |        |
| Please be consistent with capital letters                       |                 |        |
| 03                                                              | Unknown Unknown | Page 1 |
| 17/5/2018 3:05                                                  |                 |        |
| Nowadays                                                        |                 |        |
| 04                                                              | Unknown Unknown | Page 1 |
| 17/5/2018 3:05                                                  |                 |        |
| 05                                                              | Unknown Unknown | Page 1 |
| 17/5/2018 3:06                                                  |                 |        |
| 06                                                              | Unknown Unknown | Page 1 |
| 17/5/2018 3:06                                                  |                 |        |
| This phrase needs some reformulation for clarifying your point. |                 |        |
| 07                                                              | Unknown Unknown | Page 1 |
| 17/5/2018 3:07                                                  |                 |        |
| is there a ',' missing?                                         |                 |        |



|    |                                                                                           |        |
|----|-------------------------------------------------------------------------------------------|--------|
| 08 | Unknown Unknown                                                                           | Page 1 |
|    | 17/5/2018 3:06<br>models                                                                  |        |
| 09 | Unknown Unknown                                                                           | Page 1 |
|    | 17/5/2018 3:06                                                                            |        |
| 10 | Unknown Unknown                                                                           | Page 1 |
|    | 17/5/2018 3:07                                                                            |        |
| 11 | Unknown Unknown                                                                           | Page 1 |
|    | 17/5/2018 3:08<br>2017-2015 = 2 years?                                                    |        |
| 12 | Unknown Unknown                                                                           | Page 1 |
|    | 17/5/2018 3:09<br>This phrase needs to be reformulated, there is a verb missing somewhere |        |
| 13 | Unknown Unknown                                                                           | Page 1 |
|    | 17/5/2018 3:08<br>spaces!                                                                 |        |
| 14 | Unknown Unknown                                                                           | Page 1 |
|    | 17/5/2018 3:07                                                                            |        |
| 15 | Unknown Unknown                                                                           | Page 1 |
|    | 17/5/2018 3:08                                                                            |        |
| 16 | Unknown Unknown                                                                           | Page 1 |
|    | 17/5/2018 3:10<br><br>What are these abbreviations??                                      |        |
| 17 | Unknown Unknown                                                                           | Page 1 |
|    | 17/5/2018 3:10                                                                            |        |

|    |                                                                                                                                   |        |
|----|-----------------------------------------------------------------------------------------------------------------------------------|--------|
| 18 | Unknown Unknown                                                                                                                   | Page 1 |
|    | 17/5/2018 3:11                                                                                                                    |        |
|    | The last part of your abstract needs heavy redacting. I am having a lot difficulties to understand the point you are making here. |        |
| 19 | Unknown Unknown                                                                                                                   | Page 1 |
|    | 17/5/2018 3:09                                                                                                                    |        |
| 20 | Unknown Unknown                                                                                                                   | Page 1 |
|    | 17/5/2018 3:11                                                                                                                    |        |
|    | Keywords:                                                                                                                         |        |
| 21 | Unknown Unknown                                                                                                                   | Page 1 |
|    | 17/5/2018 3:11                                                                                                                    |        |
| 22 | Unknown Unknown                                                                                                                   | Page 2 |
|    | 17/5/2018 3:12                                                                                                                    |        |
| 23 | Unknown Unknown                                                                                                                   | Page 2 |
|    | 17/5/2018 3:13                                                                                                                    |        |
|    | Again be consistent with always starting with capital letters or not, e.g. wind turbine vs Power law                              |        |
| 24 | Unknown Unknown                                                                                                                   | Page 2 |
|    | 17/5/2018 3:12                                                                                                                    |        |
|    | tabulation and 'maximum'                                                                                                          |        |
| 25 | Unknown Unknown                                                                                                                   | Page 2 |
|    | 17/5/2018 3:12                                                                                                                    |        |
| 26 | Unknown Unknown                                                                                                                   | Page 2 |
|    | 17/5/2018 3:14                                                                                                                    |        |
|    | units missing                                                                                                                     |        |
| 27 | Unknown Unknown                                                                                                                   | Page 2 |
|    | 17/5/2018 3:13                                                                                                                    |        |

- 28 Unknown Unknown Page 2  
17/5/2018 3:15  
It is Coriolis (it was the scientist who came up with this stuff)
- 29 Unknown Unknown Page 2  
17/5/2018 3:14
- 30 Unknown Unknown Page 2  
17/5/2018 3:15  
what is the slash doing here?
- 31 Unknown Unknown Page 2  
17/5/2018 3:15
- 32 Unknown Unknown Page 3  
17/5/2018 3:16  
Starting a sentence with a number is not necessarily a good idea.
- 33 Unknown Unknown Page 3  
17/5/2018 3:15
- 34 Unknown Unknown Page 3  
17/5/2018 3:17  
what do you want to say here?
- 35 Unknown Unknown Page 3  
17/5/2018 3:17
- 36 Unknown Unknown Page 3  
17/5/2018 3:18  
No it is necessary to project a wind farm. Erecting is done with cranes and other heavy lifting equipment.
- 37 Unknown Unknown Page 3  
17/5/2018 3:17

|    |                                                      |        |
|----|------------------------------------------------------|--------|
| 38 | Unknown Unknown                                      | Page 3 |
|    | 17/5/2018 3:18<br>vane                               |        |
| 39 | Unknown Unknown                                      | Page 3 |
|    | 17/5/2018 3:18<br>What does the IEC do here?         |        |
| 40 | Unknown Unknown                                      | Page 3 |
|    | 17/5/2018 3:18<br>wind power                         |        |
| 41 | Unknown Unknown                                      | Page 3 |
|    | 17/5/2018 3:18                                       |        |
| 42 | Unknown Unknown                                      | Page 3 |
|    | 17/5/2018 3:18                                       |        |
| 43 | Unknown Unknown                                      | Page 3 |
|    | 17/5/2018 3:18                                       |        |
| 44 | Unknown Unknown                                      | Page 3 |
|    | 17/5/2018 3:20<br>Drop the () and reformulate phrase |        |
| 45 | Unknown Unknown                                      | Page 3 |
|    | 17/5/2018 3:20                                       |        |
| 46 | Unknown Unknown                                      | Page 3 |
|    | 17/5/2018 3:20<br>Names capital                      |        |
| 47 | Unknown Unknown                                      | Page 3 |
|    | 17/5/2018 3:20<br>see last phrase                    |        |

|    |                                                                     |        |
|----|---------------------------------------------------------------------|--------|
| 48 | Unknown Unknown                                                     | Page 3 |
|    | 17/5/2018 3:20                                                      |        |
| 49 | Unknown Unknown                                                     | Page 3 |
|    | 17/5/2018 3:20                                                      |        |
| 50 | Unknown Unknown                                                     | Page 3 |
|    | 17/5/2018 3:21                                                      |        |
|    | It is Doppler                                                       |        |
| 51 | Unknown Unknown                                                     | Page 3 |
|    | 17/5/2018 3:21                                                      |        |
| 52 | Unknown Unknown                                                     | Page 3 |
|    | 17/5/2018 3:22                                                      |        |
|    | Be consistent with your abbreviations, is it DH or D&H              |        |
| 53 | Unknown Unknown                                                     | Page 3 |
|    | 17/5/2018 3:21                                                      |        |
| 54 | Unknown Unknown                                                     | Page 3 |
|    | 17/5/2018 3:22                                                      |        |
|    | see earlier note                                                    |        |
| 55 | Unknown Unknown                                                     | Page 3 |
|    | 17/5/2018 3:22                                                      |        |
| 56 | Unknown Unknown                                                     | Page 3 |
|    | 17/5/2018 3:23                                                      |        |
|    | spaces between numbers and units, this goes for the entire article! |        |
| 57 | Unknown Unknown                                                     | Page 3 |
|    | 17/5/2018 3:22                                                      |        |

|    |                                                           |        |
|----|-----------------------------------------------------------|--------|
| 58 | Unknown Unknown                                           | Page 3 |
|    | 17/5/2018 3:23<br>be the finest                           |        |
| 59 | Unknown Unknown                                           | Page 3 |
|    | 17/5/2018 3:23                                            |        |
| 60 | Unknown Unknown                                           | Page 3 |
|    | 17/5/2018 3:24<br>what is that?                           |        |
| 61 | Unknown Unknown                                           | Page 3 |
|    | 17/5/2018 3:24                                            |        |
| 62 | Unknown Unknown                                           | Page 3 |
|    | 17/5/2018 3:24<br>This is not a correct English sentence. |        |
| 63 | Unknown Unknown                                           | Page 3 |
|    | 17/5/2018 3:24                                            |        |
| 64 | Unknown Unknown                                           | Page 3 |
|    | 17/5/2018 3:25                                            |        |
| 65 | Unknown Unknown                                           | Page 3 |
|    | 17/5/2018 3:25<br>wind                                    |        |
| 66 | Unknown Unknown                                           | Page 3 |
|    | 17/5/2018 3:25                                            |        |
| 67 | Unknown Unknown                                           | Page 3 |
|    | 17/5/2018 3:25                                            |        |



|    |                                              |        |
|----|----------------------------------------------|--------|
| 68 | Unknown Unknown                              | Page 3 |
|    | 17/5/2018 3:25                               |        |
|    | Unnecessary and wrong usage of abbreviation. |        |
| 69 | Unknown Unknown                              | Page 3 |
|    | 17/5/2018 3:26                               |        |
|    | Formulation!                                 |        |
| 70 | Unknown Unknown                              | Page 3 |
|    | 17/5/2018 3:25                               |        |
| 71 | Unknown Unknown                              | Page 3 |
|    | 17/5/2018 3:26                               |        |
| 72 | Unknown Unknown                              | Page 3 |
|    | 17/5/2018 3:26                               |        |
|    | on                                           |        |
| 73 | Unknown Unknown                              | Page 3 |
|    | 17/5/2018 3:26                               |        |
| 74 | Unknown Unknown                              | Page 3 |
|    | 17/5/2018 3:27                               |        |
|    | What is Indian Condition?                    |        |
| 75 | Unknown Unknown                              | Page 3 |
|    | 17/5/2018 3:26                               |        |
| 76 | Unknown Unknown                              | Page 3 |
|    | 17/5/2018 3:27                               |        |
| 77 | Unknown Unknown                              | Page 3 |
|    | 17/5/2018 3:27                               |        |

|    |                                                                                                        |        |
|----|--------------------------------------------------------------------------------------------------------|--------|
| 78 | Unknown Unknown                                                                                        | Page 3 |
|    | 17/5/2018 3:27                                                                                         |        |
|    | This phrase needs a lot of cosmetic redo, not understandable                                           |        |
| 79 | Unknown Unknown                                                                                        | Page 4 |
|    | 17/5/2018 3:28                                                                                         |        |
|    | Due to the simpl....                                                                                   |        |
| 80 | Unknown Unknown                                                                                        | Page 4 |
|    | 17/5/2018 3:29                                                                                         |        |
|    | of the PL model (do not drop 'the', it is often needed, this again goes for the entire article)        |        |
| 81 | Unknown Unknown                                                                                        | Page 4 |
|    | 17/5/2018 3:28                                                                                         |        |
| 82 | Unknown Unknown                                                                                        | Page 4 |
|    | 17/5/2018 3:28                                                                                         |        |
| 83 | Unknown Unknown                                                                                        | Page 4 |
|    | 17/5/2018 3:29                                                                                         |        |
| 84 | Unknown Unknown                                                                                        | Page 4 |
|    | 17/5/2018 3:29                                                                                         |        |
|    | no English                                                                                             |        |
| 85 | Unknown Unknown                                                                                        | Page 4 |
|    | 17/5/2018 3:31                                                                                         |        |
|    | It is probably have instead of had, or do you want to reference to specific event in the earlier past? |        |
| 86 | Unknown Unknown                                                                                        | Page 4 |
|    | 17/5/2018 3:30                                                                                         |        |
| 87 | Unknown Unknown                                                                                        | Page 4 |
|    | 17/5/2018 3:31                                                                                         |        |
|    | Karman was a scientist.                                                                                |        |

|    |                                                                    |        |
|----|--------------------------------------------------------------------|--------|
| 88 | Unknown Unknown                                                    | Page 4 |
|    | 17/5/2018 3:31                                                     |        |
| 89 | Unknown Unknown                                                    | Page 4 |
|    | 17/5/2018 3:31                                                     |        |
| 90 | Unknown Unknown                                                    | Page 4 |
|    | 17/5/2018 3:32                                                     |        |
|    | protected white space, 0.4 should not break on new line, bad style |        |
| 91 | Unknown Unknown                                                    | Page 4 |
|    | 17/5/2018 3:32                                                     |        |
|    | definition missing, than or then, no english                       |        |
| 92 | Unknown Unknown                                                    | Page 4 |
|    | 17/5/2018 3:32                                                     |        |
| 93 | Unknown Unknown                                                    | Page 4 |
|    | 17/5/2018 3:33                                                     |        |
|    | no , here                                                          |        |
| 94 | Unknown Unknown                                                    | Page 4 |
|    | 17/5/2018 3:33                                                     |        |
| 95 | Unknown Unknown                                                    | Page 4 |
|    | 17/5/2018 3:33                                                     |        |
| 96 | Unknown Unknown                                                    | Page 4 |
|    | 17/5/2018 3:33                                                     |        |
|    | Which pet?                                                         |        |
| 97 | Unknown Unknown                                                    | Page 4 |
|    | 17/5/2018 3:33                                                     |        |

|     |                                                        |        |
|-----|--------------------------------------------------------|--------|
| 98  | Unknown Unknown                                        | Page 4 |
|     | 17/5/2018 3:33<br>stands                               |        |
| 99  | Unknown Unknown                                        | Page 4 |
|     | 17/5/2018 3:33                                         |        |
| 100 | Unknown Unknown                                        | Page 4 |
|     | 17/5/2018 3:34<br>problem with formula                 |        |
| 101 | Unknown Unknown                                        | Page 4 |
|     | 17/5/2018 3:34                                         |        |
| 102 | Unknown Unknown                                        | Page 4 |
|     | 17/5/2018 3:34                                         |        |
| 103 | Unknown Unknown                                        | Page 4 |
|     | 17/5/2018 3:34<br>improve english                      |        |
| 104 | Unknown Unknown                                        | Page 4 |
|     | 17/5/2018 3:34<br>section title should be on next page |        |
| 105 | Unknown Unknown                                        | Page 4 |
|     | 17/5/2018 3:34                                         |        |
| 106 | Unknown Unknown                                        | Page 5 |
|     | 17/5/2018 3:35<br>???                                  |        |
| 107 | Unknown Unknown                                        | Page 5 |
|     | 17/5/2018 3:35<br>In comparison                        |        |

|     |                                                                      |        |
|-----|----------------------------------------------------------------------|--------|
| 108 | Unknown Unknown                                                      | Page 5 |
|     | 17/5/2018 3:35                                                       |        |
| 109 | Unknown Unknown                                                      | Page 5 |
|     | 17/5/2018 3:35                                                       |        |
| 110 | Unknown Unknown                                                      | Page 5 |
|     | 17/5/2018 3:35                                                       |        |
| 111 | Unknown Unknown                                                      | Page 5 |
|     | 17/5/2018 3:35                                                       |        |
| 112 | Unknown Unknown                                                      | Page 5 |
|     | 17/5/2018 3:35                                                       |        |
| 113 | Unknown Unknown                                                      | Page 6 |
|     | 17/5/2018 3:36                                                       |        |
|     | Please do not abbreviate it like that, you could just use Ri instead |        |
| 114 | Unknown Unknown                                                      | Page 6 |
|     | 17/5/2018 3:36                                                       |        |
| 115 | Unknown Unknown                                                      | Page 7 |
|     | 17/5/2018 3:39                                                       |        |
|     | What is the point in showing this graphic?                           |        |
| 116 | Unknown Unknown                                                      | Page 7 |
|     | 17/5/2018 3:39                                                       |        |
|     | What do you mean?                                                    |        |
| 117 | Unknown Unknown                                                      | Page 7 |
|     | 17/5/2018 3:39                                                       |        |
| 118 | Unknown Unknown                                                      | Page 8 |
|     | 17/5/2018 3:40                                                       |        |
|     | Mean was not a scientist, so better write mean                       |        |

|     |                                                                                                      |        |
|-----|------------------------------------------------------------------------------------------------------|--------|
| 119 | Unknown Unknown                                                                                      | Page 8 |
|     | 17/5/2018 3:40                                                                                       |        |
| 120 | Unknown Unknown                                                                                      | Page 8 |
|     | 17/5/2018 3:40                                                                                       |        |
| 121 | Unknown Unknown                                                                                      | Page 8 |
|     | 17/5/2018 3:45                                                                                       |        |
|     | no english                                                                                           |        |
| 122 | Unknown Unknown                                                                                      | Page 8 |
|     | 17/5/2018 3:44                                                                                       |        |
| 123 | Unknown Unknown                                                                                      | Page 8 |
|     | 17/5/2018 3:44                                                                                       |        |
| 124 | Unknown Unknown                                                                                      | Page 8 |
|     | 17/5/2018 3:44                                                                                       |        |
|     | it is turbulence intensity                                                                           |        |
| 125 | Unknown Unknown                                                                                      | Page 8 |
|     | 17/5/2018 3:42                                                                                       |        |
| 126 | Unknown Unknown                                                                                      | Page 8 |
|     | 17/5/2018 3:44                                                                                       |        |
| 127 | Unknown Unknown                                                                                      | Page 8 |
|     | 17/5/2018 3:44                                                                                       |        |
|     | from 100 m to 80 m it decreases 0.019 and from 80 m to 50 m only 0.07. That sounds a bit suspicious. |        |
| 128 | Unknown Unknown                                                                                      | Page 8 |
|     | 17/5/2018 3:41                                                                                       |        |
|     | Axes labeling, units                                                                                 |        |



|     |                                                                                                                                     |         |
|-----|-------------------------------------------------------------------------------------------------------------------------------------|---------|
| 129 | Unknown Unknown                                                                                                                     | Page 9  |
|     | 17/5/2018 3:47                                                                                                                      |         |
|     | There is no discussion and no referencing of these graphics in your article.<br>They are also not very clear and very hard to read. |         |
|     | Perhaps just drop them?                                                                                                             |         |
| 130 | Unknown Unknown                                                                                                                     | Page 10 |
|     | 17/5/2018 3:49                                                                                                                      |         |
|     | All graphics are badly scaled.                                                                                                      |         |
| 131 | Unknown Unknown                                                                                                                     | Page 10 |
|     | 17/5/2018 3:49                                                                                                                      |         |
|     | Whats happening to your energy roses from may to august?                                                                            |         |
| 132 | Unknown Unknown                                                                                                                     | Page 11 |
|     | 17/5/2018 3:48                                                                                                                      |         |
| 133 | Unknown Unknown                                                                                                                     | Page 11 |
|     | 17/5/2018 3:48                                                                                                                      |         |
| 134 | Unknown Unknown                                                                                                                     | Page 11 |
|     | 17/5/2018 3:48                                                                                                                      |         |
| 135 | Unknown Unknown                                                                                                                     | Page 11 |
|     | 17/5/2018 3:51                                                                                                                      |         |
|     | hard to read, very small                                                                                                            |         |
| 136 | Unknown Unknown                                                                                                                     | Page 12 |
|     | 17/5/2018 3:52                                                                                                                      |         |
| 137 | Unknown Unknown                                                                                                                     | Page 12 |
|     | 17/5/2018 3:52                                                                                                                      |         |
| 138 | Unknown Unknown                                                                                                                     | Page 12 |
|     | 17/5/2018 3:52                                                                                                                      |         |

139 Unknown Unknown Page 12

---

17/5/2018 3:52

140 Unknown Unknown Page 12

---

17/5/2018 3:52

141 Unknown Unknown Page 12

---

17/5/2018 3:53

???

142 Unknown Unknown Page 12

---

17/5/2018 3:53

143 Unknown Unknown Page 12

---

17/5/2018 3:53

no english

144 Unknown Unknown Page 12

---

17/5/2018 3:53

no comma

145 Unknown Unknown Page 12

---

17/5/2018 3:53

146 Unknown Unknown Page 12

---

17/5/2018 3:53
