# Supplementary material for: Effect of Atmospheric Stability on the Wind Resource extrapolating models for large capacity Wind Turbines: A Comparative Analysis of Power Law, Log Law and Deaves and Harris mode
Source: Copernicus journal article supplement (doi:10.5194/wes-2018-16), 2018-04-03
Supplement: Supplementary file [file wes-2018-16-SC1-supplement.pdf]

**Table 1 Five different stability classes based on the Value of Froude Number**

| Range of Froude Number      | Condition of Stability | Range of Wind Speed (m/s) |
|-----------------------------|------------------------|---------------------------|
| $-2 < \frac{1}{Fr} < -1$    | Very stable            | 1.5-2.5                   |
| $-1 < \frac{1}{Fr} < -0.6$  | Unstable               | 3.5-4.5                   |
| $-0.2 < \frac{1}{Fr} < 0.2$ | Neutral                | 4.5-5.5                   |
| $0.6 < \frac{1}{Fr} < 1$    | Stable                 | 6.5-7.5                   |
| $1 < \frac{1}{Fr} < 2$      | Very stable            | 7.5-8.5                   |

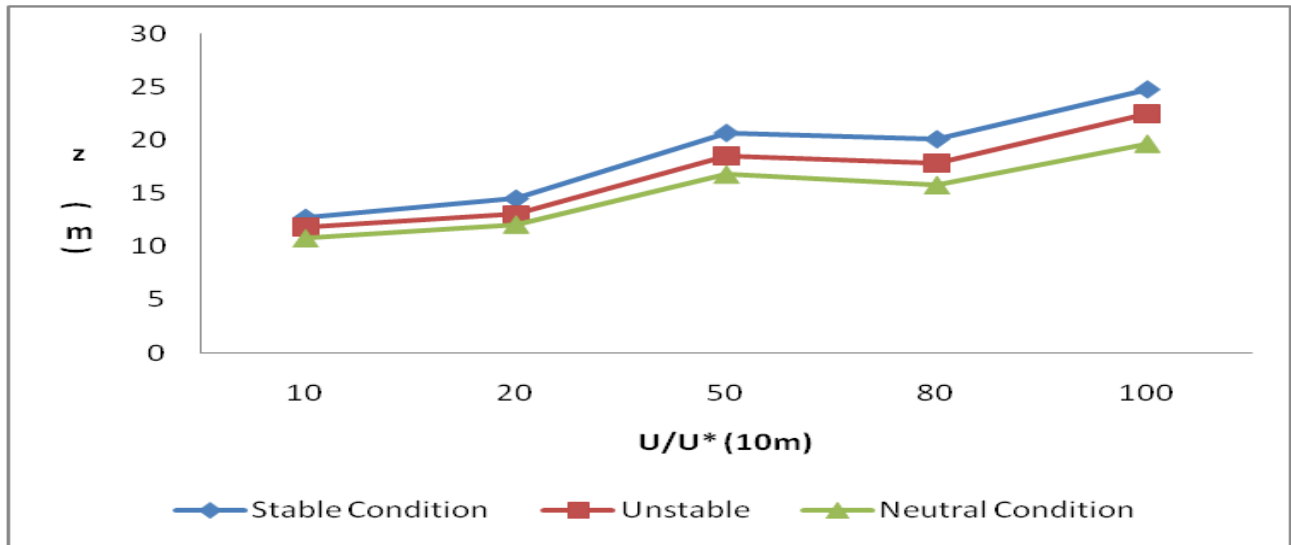

Fig. 1. Non-dimension Velocity profile for three stability classes. Stability regions are classified based on the different Obukhu lengths.

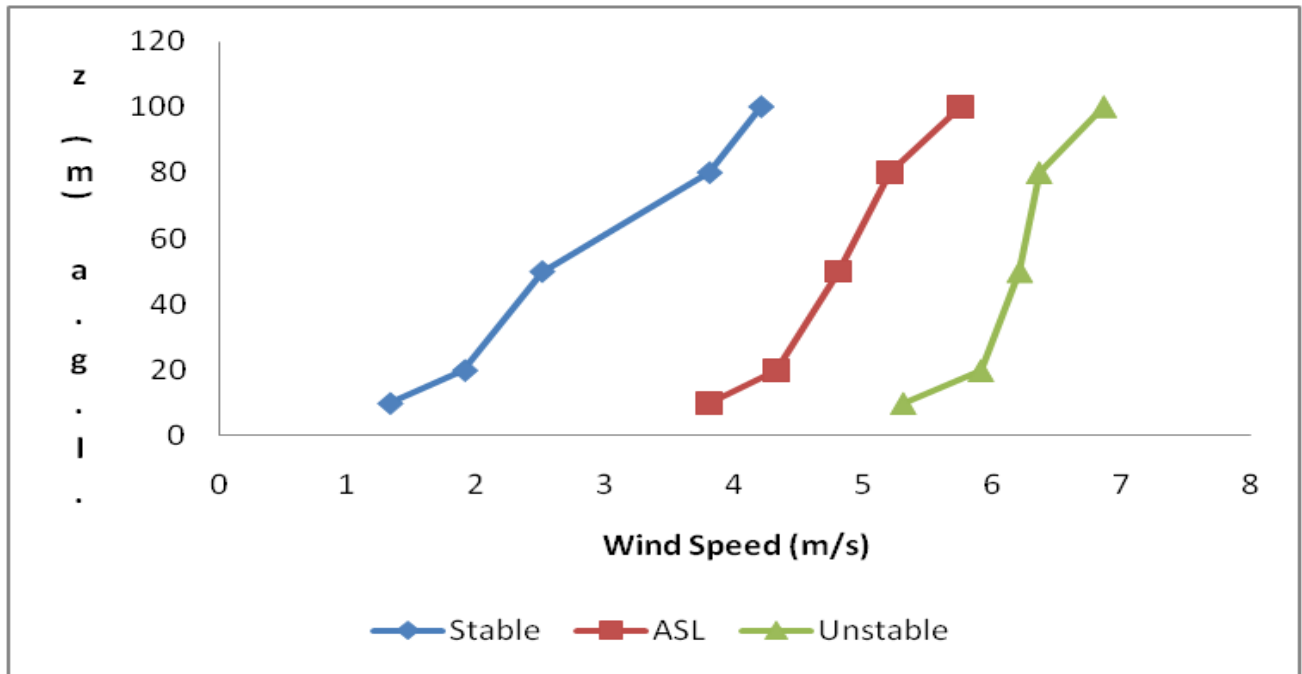

Fig. 2. Velocity profile for Masts M1 (All dotted points are 10 min averages)

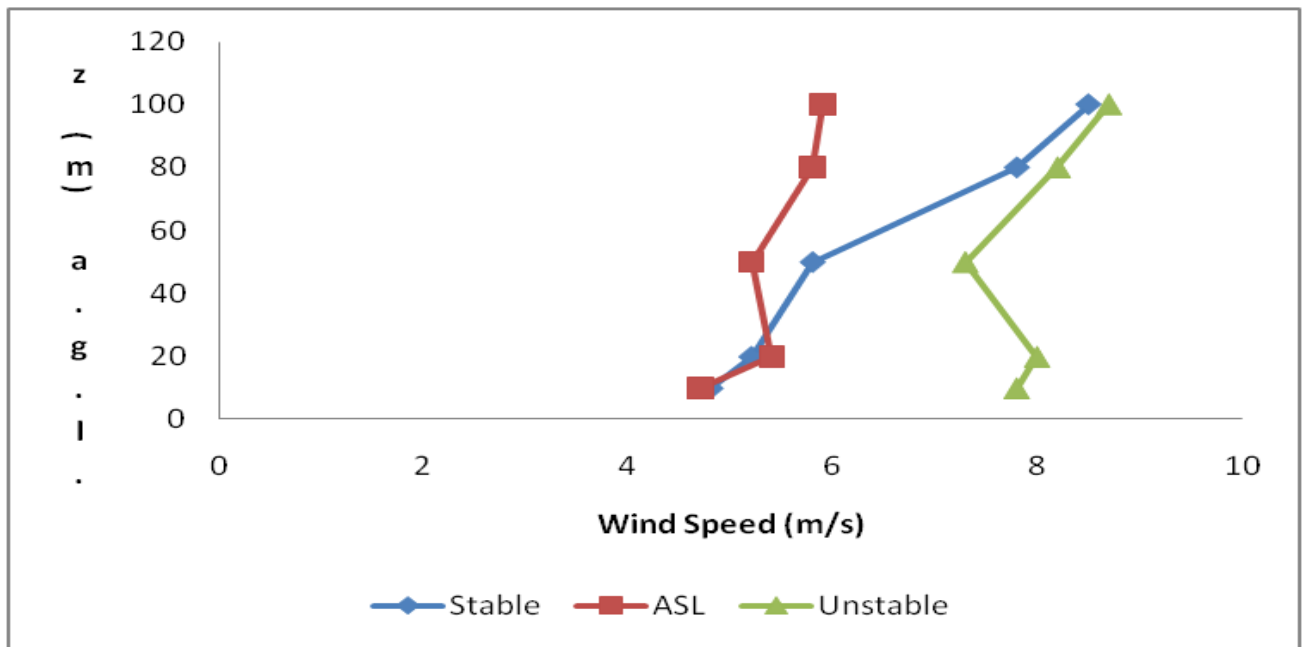

Fig. 3. Velocity profile for Masts M2 (All dotted points are 10 min averages)
